# Supplementary material
Source: PubMed Central journal article supplement (PMC115353)

**Electrophoretic mobility shift assay:**

loading concentration: 45  $\mu$ M

100 mM NaCl, 2 mM MgCl<sub>2</sub>, 100 mM Tris.HCl, pH 7.4

(detailed conditions see Material and Methods)

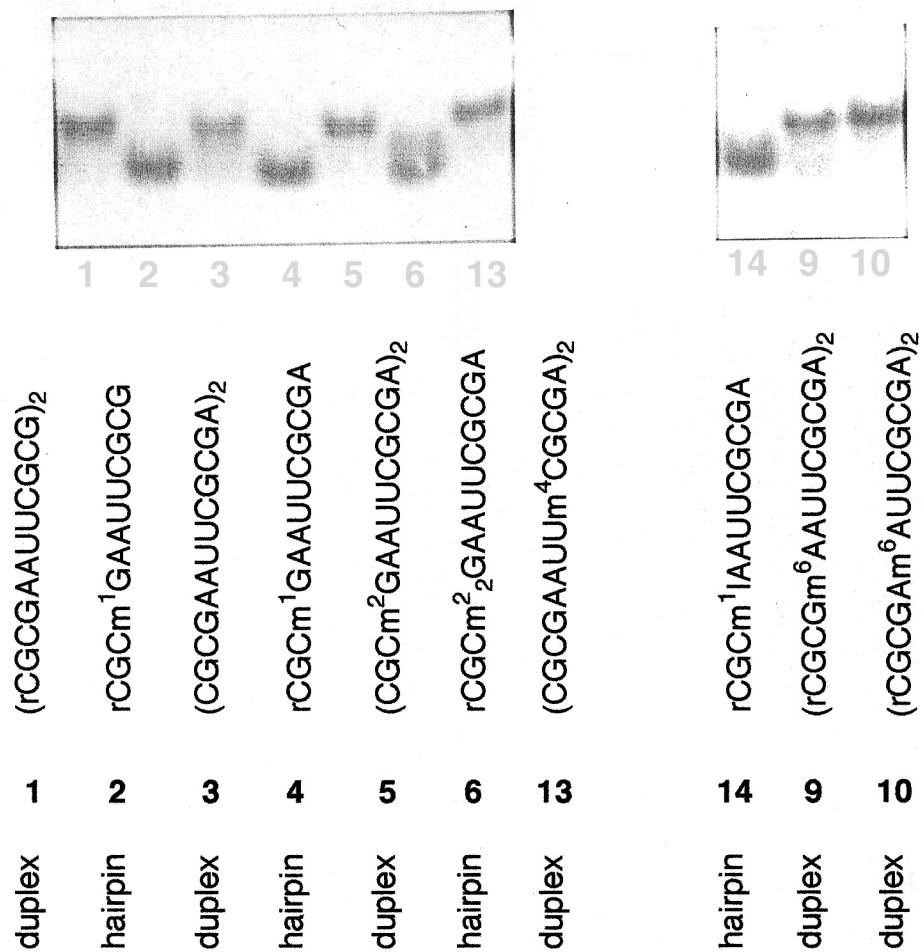

Supplement: nar_29_19_3997__1.pdf [file nar_29_19_3997__1.pdf]
